# Supplementary material for: N-Doped porous biocarbon materials derived from soya peptone as efficient electrocatalysts for the ORR
Source: Royal Society of Chemistry journal article supplement (doi:10.1039/d0nj06080a), 2021-01-01
Supplement: d0nj06080a1.pdf [file d0nj06080a1.pdf]

## Supporting Information

### N-doped porous biocarbon materials derived

### from soya peptone as efficient electrocatalysts for ORR<sup>†</sup>

Song Liang,<sup>‡a</sup> Zhi-Da Wang,<sup>‡a</sup> Zhong-Feng Guo,<sup>a</sup> Xin-Yu Chen,<sup>b</sup> Si-Qi Li,<sup>b</sup> Bing-Di Wang,<sup>a</sup> Guo-Long Lu,<sup>a</sup> Hang Sun,<sup>a</sup> Zhen-Ning Liu<sup>\*a</sup> and Hong-Ying Zang<sup>b</sup>

<sup>a</sup> Key Laboratory of Bionic Engineering (Ministry of Education), College of Biological and Agricultural Engineering, Jilin University, Changchun, 130022, P. R. China. E-mail: [liu\\_zhenning@jlu.edu.cn](mailto:liu_zhenning@jlu.edu.cn)

<sup>b</sup> Key Laboratory of Polyoxometalate Science of the Ministry of Education, Faculty of Chemistry, Northeast Normal University, Changchun, 130024, China

<sup>‡</sup> Contributed equally

#### Figures and captions

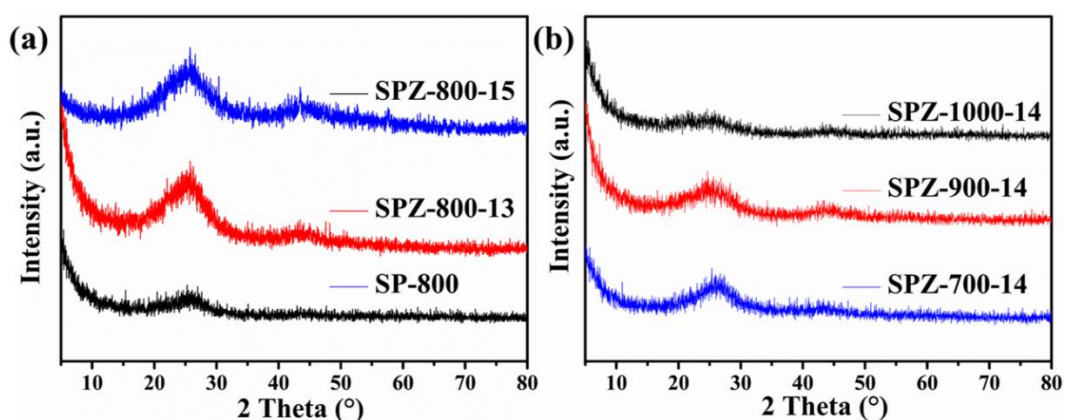

**Figure S1.** XRD patterns of SP-800, SPZ-800-13, SPZ-800-15, SPZ-700-14, SPZ-900-14, and SPZ-1000-14.

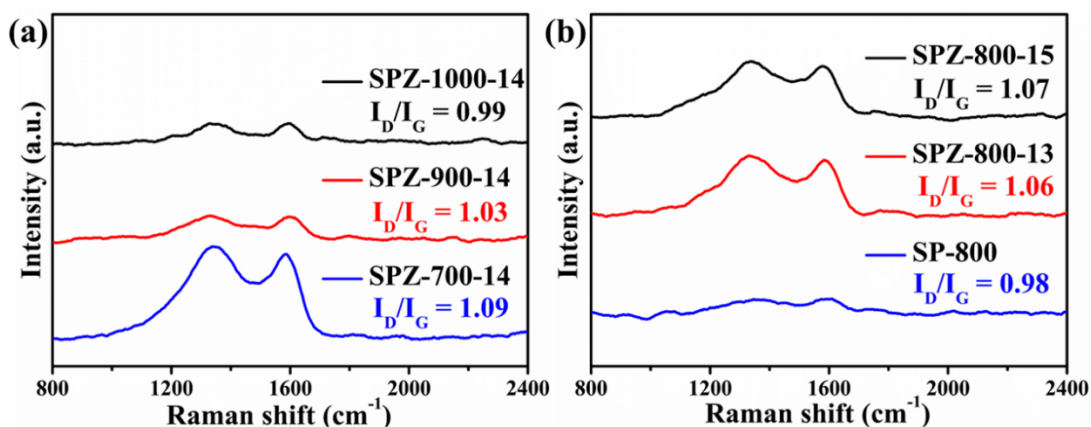

**Figure S2.** Raman spectra of SP-800, SPZ-800-13, SPZ-800-15, SPZ-700-14, SPZ-900-14, and SPZ-1000-14.

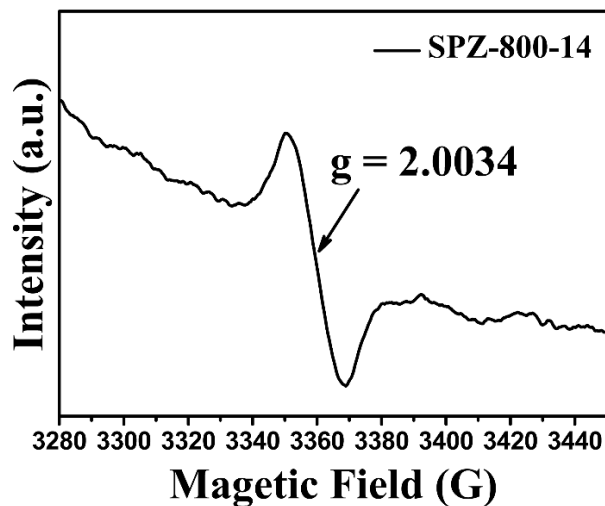

**Figure S3.** EPR spectra of SPZ-800-14.

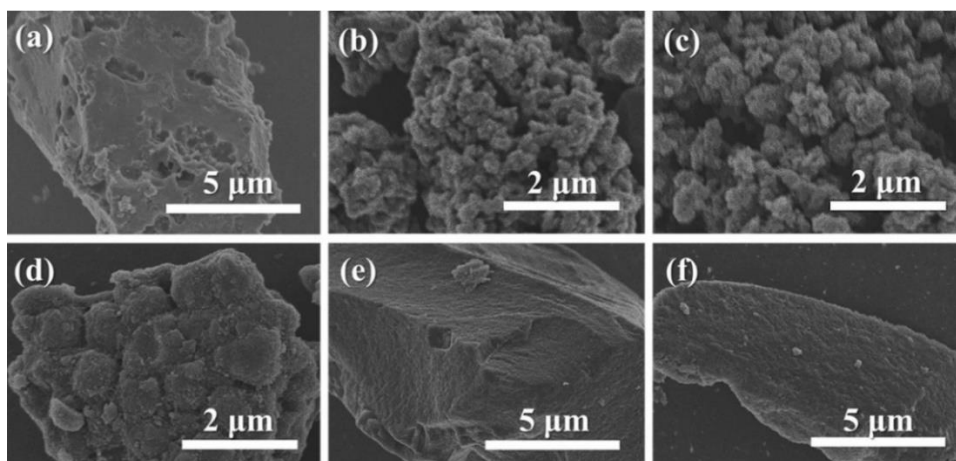

**Figure S4.** SEM of (a) SP-800, (b) SPZ-800-13, (c) SPZ-800-15, (d) SPZ-700-14, (e) SPZ-900-14, and (f) SPZ-1000-14.

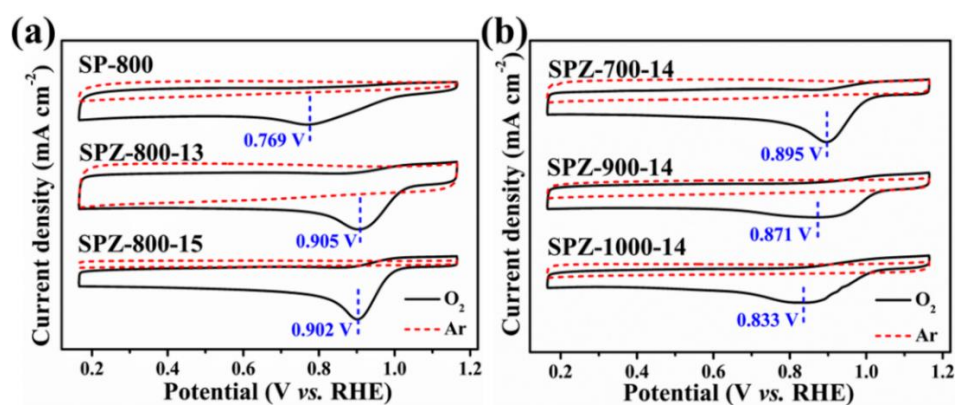

**Figure S5.** Cyclic voltammetry (CV) curves of SP-800, SPZ-800-13, SPZ-800-15, SPZ-700-14, SPZ-900-14, and SPZ-1000-14 for ORR measured in Ar- and O<sub>2</sub>- saturated 0.1 M KOH electrolyte.

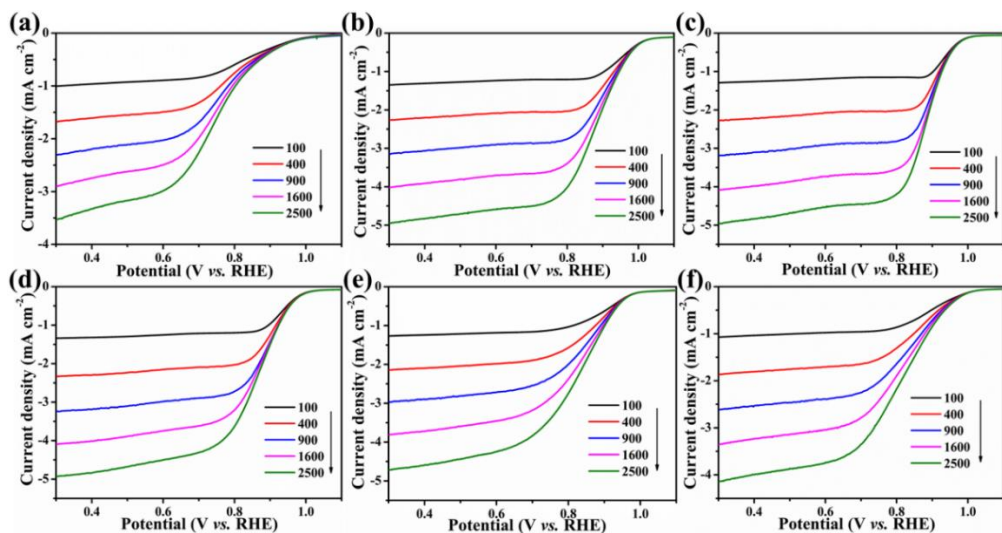

**Figure S6.** The ORR catalytic activities of (a) SP-800, (b) SPZ-800-13, (c) SPZ-800-15, (d) SPZ-700-14, (e) SPZ-900-14, and (f) SPZ-1000-14 evaluated by LSV tests at different rotation rates (from 100 rpm to 2500 rpm) with a scan rate of  $10 \text{ mV} \cdot \text{s}^{-1}$  in  $\text{O}_2$ -saturated  $0.1 \text{ M KOH}$  electrolyte.

**Table S1.** The ORR parameters compared with the catalysts in the paper.

| Catalysts   | $E_{onset}$<br>(V vs. RHE) | $E_{1/2}$<br>(V vs. RHE) | $J_L$<br>(mA cm <sup>-2</sup> ) |
|-------------|----------------------------|--------------------------|---------------------------------|
| SPZ-800-14  | 1.02                       | 0.894                    | 4.56                            |
| SP-800      | 0.871                      | 0.751                    | 2.89                            |
| SPZ-800-13  | 0.999                      | 0.889                    | 4.02                            |
| SPZ-800-15  | 0.985                      | 0.887                    | 4.09                            |
| SPZ-700-14  | 0.979                      | 0.871                    | 4.09                            |
| SPZ-900-14  | 0.957                      | 0.835                    | 3.81                            |
| SPZ-1000-14 | 0.946                      | 0.818                    | 3.36                            |

**Table S2.** The ORR parameters compared with state-of-the-art ORR catalysts in the literature.

| Catalysts      | $E_{onset}$<br>(V vs. RHE) | $E_{1/2}$<br>(V vs. RHE) | $J_L$<br>(mA cm <sup>-2</sup> ) | Ref.      |
|----------------|----------------------------|--------------------------|---------------------------------|-----------|
| SPZ-800-14     | 1.02                       | 0.894                    | 4.56                            | This work |
| SA-Zn-NHPC     | 1.00                       | 0.87                     | 5.85                            | [1]       |
| NCN-7          | 0.99                       | 0.87                     | 5.5                             | [2]       |
| WC-3-0.8       | 0.98                       | 0.875                    | 6.08                            | [3]       |
| Zn-S-N-C       | 0.962                      | 0.894                    | -                               | [4]       |
| NHPC-0.5       | 1.004                      | 0.883                    | 3.4682                          | [5]       |
| G1000-ZC-2.0   | 1.03                       | 0.885                    | 6.2                             | [6]       |
| Zn-N-C         | -                          | 0.873                    | -                               | [7]       |
| DANC-800-138   | 0.985                      | 0.813                    | -                               | [8]       |
| CTF-Super P-10 | 0.981                      | 0.883                    | 5.31                            | [9]       |
| WHCR-Zn        | 0.93                       | 0.80                     | -                               | [10]      |
| DZ14           | 0.894                      | -                        | -                               | [11]      |
| PG300Z-800     | 0.98                       | 0.8                      | 3.1                             | [12]      |
| RZ9            | 0.91                       | -                        | -                               | [13]      |
| N/PC-800       | 0.958                      | 0.799                    | 3.99                            | [14]      |
| FS350Z-900     | 1.00                       | -                        | -                               | [15]      |
| WHC-700        | 0.98                       | -                        | 4.15                            | [16]      |
| THNC-800       | 0.92                       | -                        | 2.67                            | [17]      |

**Table S3.** The performance of electrically Zn-air batteries in the literature.

| Catalysts  | Electrolyte                                | Peak power density<br>(mW·cm <sup>-2</sup> ) | Stability  | Ref.      |
|------------|--------------------------------------------|----------------------------------------------|------------|-----------|
| SPZ-800-14 | 6.0 M KOH and<br>0.2 M Zn(Ac) <sub>2</sub> | 70                                           | 90 h       | This work |
| WC-3-0.8   | 6.0 M KOH and<br>0.2 M ZnCl <sub>2</sub>   | 84.1                                         | -          | [3]       |
| NHPC-0.5   | 6 M KOH                                    | 25.1                                         | 100 cycles | [5]       |
| MS-NPC     | Gel electrolyte                            | 127.9                                        | -          | [18]      |
| G800       | 6 M KOH                                    | -                                            | 18         | [19]      |
| N-CNSP     | 6 M KOH                                    | 160                                          | 160        | [20]      |

## References

- [1] N. Wang, Z. Liu, J. Ma, J. Liu, P. Zhou, Y. Chao, C. Ma, X. Bo, J. Liu, Y. Hei, Y. Bi, M. Sun, M. Cao, H. Zhang, F. Chang, H.-L. Wang, P. Xu, Z. Hu, J. Bai, H. Sun, G. Hu, M. Zhou, *ACS Sustain. Chem. Eng.*, 2020, **8**, 13813-13822.
- [2] F. Zhang, L. Liu, L. Chen, Y. Shi, *New J. Chem.*, 2020, **44**, 10613-10620.
- [3] S. Yan, Z. Yu, C. Liu, Z. Yuan, C. Wang, J. Chen, L. Wei, Y. Chen, *Chem Asian J*, 2020, **15**, 1881-1889.
- [4] Q.C. Cao, X.B. Ding, F. Li, Y.H. Qin, C. Wang, *J. Colloid Interface Sci.*, 2020, **576**, 139-146.
- [5] H. Sun, H. Quan, M. Pan, Z. Zhang, Y. Zeng, D. Chen, *J. Alloys Compd.*, 2020, **826**, 154208.
- [6] B. Huang, Y. Liu, Q. Guo, Y. Fang, M.-M. Titirici, X. Wang, Z. Xie, *Carbon*, 2020, **156**, 179-186.
- [7] J. Li, S. Chen, N. Yang, M. Deng, S. Ibraheem, J. Deng, J. Li, L. Li, Z. Wei, *Angew. Chem. Int. Ed.*, 2019, **58**, 7035-7039.
- [8] J. Xu, C. Xia, M. Li, R. Xiao, *ChemElectroChem*, 2019, **6**, 5735-5743.
- [9] Y. Cao, Y. Zhu, X. Chen, B.S. Abraha, W. Peng, Y. Li, G. Zhang, F. Zhang, X. Fan, *Catal. Sci. Technol.*, 2019, **9**, 6606-6612.
- [10] M. Sriariyanun, K. Ketpang, J. Prathum, P. Juprasat, W. Junla, K. Wichianwat, A. Saejio, C. Poompipatpong, N. Chanunpanich, Y.S. Cheng, K. Rattanaporn, P. Yasurin, W. Rodiahwati, *E3S Web Conf.*, 2020, **141**, 01004.
- [11] L. Mu, R. Wang, C. Tang, *Biomass Convers. Biorefin.*, 2019, **9**, 401-409.
- [12] J. Cheng, *Int. J. Electrochem. Sci.*, 2018, **13**, 11203-11214.
- [13] Y. Wang, X. Jin, Y. Pan, J. Li, N. Guo, R, *ChemNanoMat*, 2018, **4**, 954-963.
- [14] J. Wu, J. Liu, L. Li, X. Wang, *J. Mater. Sci.*, 2017, **52**, 9794-9805.
- [15] C. Guo, R. Hu, W. Liao, Z. Li, L. Sun, D. Shi, Y. Li, C. Chen, *Electrochim. Acta*, 2017, **236**, 228-238.
- [16] X. Liu, Y. Zhou, W. Zhou, L. Li, S. Huang, S. Chen, *Nanoscale*, 2015, **7**, 6136-6142.
- [17] X. Liu, L. Li, W. Zhou, Y. Zhou, W. Niu, S. Chen, *ChemElectroChem*, 2015, **2**, 803-810.
- [18] X. Hao, W. Chen, Z. Jiang, X. Tian, X. Hao, T. Maiyalagan, Z.-J. Jiang, *Electrochim. Acta*, 2020, **362**, 137143.
- [19] A. Ilnicka, M. Skorupska, P. Romanowski, P. Kamedulski, J.P. Lukaszewicz, *Materials (Basel)*, 2020, **13**, 2115.
- [20] L. Zong, W. Wu, S. Liu, H. Yin, Y. Chen, C. Liu, K. Fan, X. Zhao, X. Chen, F. Wang, Y. Yang, L. Wang, S. Feng, *Energy Stor. Mater.*, 2020, **27**, 514-521.
